# Supplementary material for: Exploring the Mechanism of Topical Application of Clematis Florida in the Treatment of Rheumatoid Arthritis through Network Pharmacology and Experimental Validation
Source: Preprints.org preprint supplement (doi:10.20944/preprints202406.1291.v1), 2024-06-19
Supplement: Supplementary file 1 [file supplementary]

## Sheet: Supplementary file 1
Supplementary file 1 Main compounds in CF extract
Number	m/z	RT min	Formula	compound name	adduct	Pathway
1	166.086	2.50457	C9H11NO2	Phenylalanine	[M+H]+	Amino acids and Peptides+Shikimates and Phenylpropanoids
2	154.086	2.90252	C8H15NO4	Castanospermine	[M+H-2H2O]+	Alkaloids
3	146.06	3.34	C10H9NO2	Gentianine	[M+H-CH2O]+	Alkaloids+Terpenoids
4	307.176	3.69	C15H22N4O3	SCHEMBL6907232	[M+H]+	Alkaloids
5	181.049	3.79	C14H21N3O5	Leonurine	[M+H-C5H13N3O]+	Shikimates and Phenylpropanoids
6	306.168	3.85	C17H23NO4	Anisodamine	[M+H]+	Alkaloids
7	329.218	4.74	C21H30O4	Corticosterone	[M+H-H2O]+	Terpenoids
8	195.065	5.34	C10H10O4	Isoferulic acid	[M+H]+	Shikimates and Phenylpropanoids
9	262.165	6.52	C12H20O5	4-Oxododecanedioic acid	[M+NH4]+	Fatty acids
10	308.221	6.78592	C18H29NO3	Gabapentin related compound D	[M+H]+	NA
11	501.16	8.02553	C22H30O14	Sibiricose A5	[M+H-H2O]+	Shikimates and Phenylpropanoids
12	427.266	8.27218	C18H39N2O7P	Methylcarbamyl PAF C-8	[M+H]+	Fatty acids
13	439.357	8.44	C30H48O3	Oleanolic Acid	[M+H-H2O]+	Terpenoids
14	651.278	9.34192	C38H44O8	Gambogic acid	[M+Na]+	Shikimates and Phenylpropanoids
15	353.229	10	C22H28N2O2	Anileridine	[M+H]+	Alkaloids
16	221.081	10.2073	C12H12O4	6,7-Dimethoxy-4-methylcoumarin	[M+H]+	Shikimates and Phenylpropanoids
17	353.229	10.28	C20H32O5	Prostaglandin I2	[M+H]+	Fatty acids
18	403.201	10.6439	C25H26N2O3	Aurantiamide	[M+H]+	Alkaloids+Amino acids and Peptides
19	351.214	11.3599	C22H26N2O2	Vinpocetine	[M+H]+	Alkaloids
20	445.212	11.85	C27H28N2O4	Asperglaucide	[M+H]+	Amino acids and Peptides
21	357.278	12.6	C26H43NO5	Glycodeoxycholic acid	[M+H-C2H7NO3]+	Terpenoids
22	520.339	12.68	C26H50NO7P	1-Linoleoyl-sn-glycero-3-phosphorylcholine	[M+H]+	Fatty acids
23	331.188	13.0339	C19H26FN3O2	5-Fluoro ABICA	[M+H-NH3]+	Alkaloids
24	277.216	13.53	C18H30O3	(2E,4Z)-9-Oxooctadeca-2,4-dienoic acid	[M+H-H2O]+	Fatty acids
25	277.216	13.7647	C18H30O3	9-Oxo-ODE	[M+H-H2O]+	Fatty acids
26	293.211	14.22	C18H30O4	trans-EKODE-(E)-Ib	[M+H-H2O]+	Fatty acids
27	363.31	14.89	C20H42O5	3,6,9,12-tetraoxatetracosan-1-ol	[M+H]+	Fatty acids
28	197.043	3.75	C9H10O5	Syringic acid	[M-H]-	Shikimates and Phenylpropanoids
29	153.018	3.9234	C7H6O4	Gentisic acid	[M-H]-	Shikimates and Phenylpropanoids
30	179.034	4.09198	C9H8O4	Caffeic acid	[M-H]-	Shikimates and Phenylpropanoids
31	173.08	4.84273	C8H14O4	Suberic acid	[M-H]-	Fatty acids
32	175.096	5.15193	C8H16O4	(2-Butoxyethoxy)acetic acid	[M-H]-	Fatty acids
33	193.049	5.30473	C10H10O4	Ferulic acid	[M-H]-	Shikimates and Phenylpropanoids
34	187.096	5.90185	C9H16O4	Azelaic acid	[M-H]-	Fatty acids
35	137.023	6.43	C14H10O5	Salsalate	[M-H-C7H4O2]-	Shikimates and Phenylpropanoids
36	215.045	7.06	C10H8N4S	5-Aminothiabendazole	[M-H]-	Alkaloids
37	215.128	8.3655	C11H20O4	Undecanedioic acid	[M-H]-	Fatty acids
38	329.232	9.04	C18H34O5	9-Octadecenoic acid, 5,8,11-trihydroxy-	[M-H]-	Fatty acids
39	199.05	9.8093	C11H8N2O2	Malononitrile, vanillylidene-	[M-H]-	Shikimates and Phenylpropanoids
40	329.232	10.0062	C18H34O5	FA 18:1+3o	[M-H]-	Fatty acids
41	329.232	10.2976	C18H34O5	(Z)-9,10,11-Trihydroxy-12-octadecenoic acid	[M-H]-	Fatty acids
42	329.233	10.6486	C18H34O5	15-Octadecenoic acid, 9,12,13-trihydroxy-	[M-H]-	Fatty acids
43	313.237	12	C18H34O4	12,13-DiHOME	[M-H]-	Fatty acids
44	315.253	12.4398	C17H34O2	Methyl palmitate	[M+HCO2]-	Fatty acids
45	391.284	12.6	C24H40O4	Deoxycholic acid	[M-H]-	Terpenoids
46	311.222	13.0641	C18H32O4	FA 18:2+2o	[M-H]-	Fatty acids
47	295.227	13.2727	C18H32O3	12(13)-EpOME	[M-H]-	Fatty acids
48	313.237	13.6576	C18H34O4	Octadecanedioic acid	[M-H]-	Fatty acids
49	271.227	14.9911	C16H32O3	Juniperic acid	[M-H]-	Fatty acids
50	281.248	16.3543	C18H34O2	Oleic acid	[M-H]-	Fatty acids

## Sheet: Supplementary file 2
Supplementary file 2 CF targets form TCMSP, ETCM, ITCM databases
1	Phenylalanine	PTGS1	TCMSP
	Phenylalanine	SERPIND1
	Phenylalanine	CHRM1
	Phenylalanine	ADRB1
	Phenylalanine	SCN5A
	Phenylalanine	PTGS2
	Phenylalanine	NOS3
	Phenylalanine	ADRA2A
	Phenylalanine	ADRA2C
	Phenylalanine	ACHE
	Phenylalanine	SLC6A2
	Phenylalanine	ADRA1D
	Phenylalanine	ADRA1B
	Phenylalanine	SLC6A3
	Phenylalanine	ADRB2
	Phenylalanine	DPP4
	Phenylalanine	LACTBL1
	Phenylalanine	MAOB
	Phenylalanine	LYZ
	Phenylalanine	MME
	Phenylalanine	MAOA
	Phenylalanine	CTRB1
	Phenylalanine	DRD1
	Phenylalanine	ADRA2B
	Phenylalanine	none	ETCM
	Phenylalanine	none	ITCM
2	Castanospermine	none	TCMSP
	Castanospermine	none	ETCM
	Castanospermine	none	ITCM
3	Gentianine	PTGS1	TCMSP
	Gentianine	CHRM3
	Gentianine	CHRM1
	Gentianine	PTGS2
	Gentianine	ADRA1B
	Gentianine	SLC6A3
	Gentianine	ADRB2
	Gentianine	GABRA1
	Gentianine	MAOB
	Gentianine	PRSS1
	Gentianine	ADRB1
	Gentianine	NQO2
	Gentianine	ADRA1D
	Gentianine	none	ETCM
	Gentianine	CHRM1	ITCM
	Gentianine	NOS2
	Gentianine	SLC6A3
	Gentianine	CA2
	Gentianine	PTGS2
	Gentianine	ADRA1A
	Gentianine	NQO2
	Gentianine	MAOB
	Gentianine	ADRA1B
	Gentianine	PTGS1
	Gentianine	CDK2
	Gentianine	PRSS1
	Gentianine	DPP4
	Gentianine	F2
	Gentianine	ADRB2
	Gentianine	ACHE
	Gentianine	CHRM3
	Gentianine	ADRB1
4	SCHEMBL6907232	none	TCMSP
	SCHEMBL6907232	none	ETCM
	SCHEMBL6907232	none	ITCM
	SCHEMBL6907232	none	swisstargetprediction
5	Leonurine	none	TCMSP
	Leonurine	F2	ETCM
	Leonurine	KLKB1
	Leonurine	PLG
	Leonurine		ITCM
6	Anisodamine	CHRM3	TCMSP
	Anisodamine	CHRM1
	Anisodamine	ADRA2A
	Anisodamine	OPRD1
	Anisodamine	ADRA1B
	Anisodamine	ADRB2
	Anisodamine	OPRM1
	Anisodamine	none	ETCM
	Anisodamine	SERPINE1	ITCM
	Anisodamine	CHRM1
	Anisodamine	ADRA1A
	Anisodamine	CHRM5
	Anisodamine	F3
	Anisodamine	ADRA1B
	Anisodamine	DPP4
	Anisodamine	DRD1
	Anisodamine	ADRB2
	Anisodamine	RELA
	Anisodamine	CHRM3
	Anisodamine	ADRA2A
	Anisodamine	TNF
	Anisodamine	ANPEP	swisstargetprediction
	Anisodamine	ENPEP
	Anisodamine	LAP3
7	Corticosterone	none	TCMSP
	Corticosterone	none	ETCM
	Corticosterone	none	ITCM
	Corticosterone	SERPINA6	swisstargetprediction
	Corticosterone	SHBG
8	Isoferulic acid	PTGS1	TCMSP
	Isoferulic acid	ADRB1
	Isoferulic acid	PTGS2
	Isoferulic acid	NOS3
	Isoferulic acid	ADRA2A
	Isoferulic acid	ADRA2C
	Isoferulic acid	SLC6A3
	Isoferulic acid	ADRB2
	Isoferulic acid	LTA4H
	Isoferulic acid	MAOB
	Isoferulic acid	MAOA
	Isoferulic acid	ADRA1D
	Isoferulic acid	none	ETCM
	Isoferulic acid	NOS2	ITCM
	Isoferulic acid	SLC6A3
	Isoferulic acid	CA2
	Isoferulic acid	PTGS2
	Isoferulic acid	ADRA1A
	Isoferulic acid	LTA4H
	Isoferulic acid	PPARG
	Isoferulic acid	MAOB
	Isoferulic acid	ADRA2C
	Isoferulic acid	PTGS1
	Isoferulic acid	CDK2
	Isoferulic acid	PRSS1
	Isoferulic acid	F2
	Isoferulic acid	ADRB2
	Isoferulic acid	ADRA2A
	Isoferulic acid	ADRB1
9	4-Oxododecanedioic acid	none	TCMSP
	4-Oxododecanedioic acid	none	ETCM
	4-Oxododecanedioic acid	none	ITCM
	4-Oxododecanedioic acid	none	swisstargetprediction
10	Gabapentin related compound D	none	tcmsp
	Gabapentin related compound D	none	etcm
	Gabapentin related compound D	none	itcm
	Gabapentin related compound D	none	swisstargetprediction
11	Sibiricose A5	none	tcmsp
	Sibiricose A5	none	etcm
	Sibiricose A5	none	itcm
	Sibiricose A5	none	swisstargetprediction
12	Methylcarbamyl PAF C-8	none	tcmsp
	Methylcarbamyl PAF C-8	none	etcm
	Methylcarbamyl PAF C-8	none	itcm
	Methylcarbamyl PAF C-8	none	swisstargetprediction
13	Oleanolic Acid	CASP9	TCMSP
	Oleanolic Acid	CASP3
	Oleanolic Acid	HMOX1
	Oleanolic Acid	ICAM1
	Oleanolic Acid	NQO1
	Oleanolic Acid	AMY2A
	Oleanolic Acid	ADH1C	ETCM
	Oleanolic Acid	AKR1C1
	Oleanolic Acid	AKR1C2
	Oleanolic Acid	AR
	Oleanolic Acid	CES1
	Oleanolic Acid	CLEC4E
	Oleanolic Acid	COX4I1
	Oleanolic Acid	COX5A
	Oleanolic Acid	COX5B
	Oleanolic Acid	COX6A2
	Oleanolic Acid	COX6B1
	Oleanolic Acid	COX6C
	Oleanolic Acid	COX7A1
	Oleanolic Acid	COX7B
	Oleanolic Acid	COX7C
	Oleanolic Acid	COX8A
	Oleanolic Acid	EFTUD1
	Oleanolic Acid	ESR1
	Oleanolic Acid	ESR2
	Oleanolic Acid	ESRRG
	Oleanolic Acid	FABP6
	Oleanolic Acid	FECH
	Oleanolic Acid	GABRA1
	Oleanolic Acid	GABRA2
	Oleanolic Acid	GABRA3
	Oleanolic Acid	GABRA4
	Oleanolic Acid	GABRA5
	Oleanolic Acid	GABRA6
	Oleanolic Acid	GABRB1
	Oleanolic Acid	GABRB2
	Oleanolic Acid	GABRB3
	Oleanolic Acid	GABRD
	Oleanolic Acid	GABRE
	Oleanolic Acid	GABRG1
	Oleanolic Acid	GABRG2
	Oleanolic Acid	GABRG3
	Oleanolic Acid	GABRP
	Oleanolic Acid	GABRQ
	Oleanolic Acid	GPBAR1
	Oleanolic Acid	GRIN1
	Oleanolic Acid	GRIN2A
	Oleanolic Acid	GRIN2B
	Oleanolic Acid	GRIN2C
	Oleanolic Acid	GRIN2D
	Oleanolic Acid	GRIN3A
	Oleanolic Acid	GRIN3B
	Oleanolic Acid	GSTP1
	Oleanolic Acid	HOXA10
	Oleanolic Acid	HSD11B1
	Oleanolic Acid	HSD11B2
	Oleanolic Acid	HSD17B1
	Oleanolic Acid	IGHG2
	Oleanolic Acid	LSS
	Oleanolic Acid	MT-CO1
	Oleanolic Acid	MT-CO2
	Oleanolic Acid	MT-CO3
	Oleanolic Acid	NCOA2
	Oleanolic Acid	NFKB1
	Oleanolic Acid	NFKB2
	Oleanolic Acid	NPPB
	Oleanolic Acid	NR1H4
	Oleanolic Acid	NR1I2
	Oleanolic Acid	NR1I3
	Oleanolic Acid	NR3C1
	Oleanolic Acid	NR3C2
	Oleanolic Acid	PGR
	Oleanolic Acid	PLA2G1B
	Oleanolic Acid	PPARA
	Oleanolic Acid	PRLR
	Oleanolic Acid	RORA
	Oleanolic Acid	SHBG
	Oleanolic Acid	SIGMAR1
	Oleanolic Acid	SULT2A1
	Oleanolic Acid	SULT2B1
	Oleanolic Acid	VDR
	Oleanolic Acid	MAPK14	ITCM
	Oleanolic Acid	NOS2
	Oleanolic Acid	AR
	Oleanolic Acid	PTPN1
	Oleanolic Acid	GSK3B
	Oleanolic Acid	CA2
	Oleanolic Acid	PTGS2
	Oleanolic Acid	HSP90AA1
	Oleanolic Acid	PRKACA
	Oleanolic Acid	PKIA
	Oleanolic Acid	PDE3A
	Oleanolic Acid	PPARG
	Oleanolic Acid	MAOB
	Oleanolic Acid	PTGS1
	Oleanolic Acid	CCNA2
	Oleanolic Acid	CDK2
	Oleanolic Acid	PRSS1
	Oleanolic Acid	CALM1
	Oleanolic Acid	RXRA
	Oleanolic Acid	CHEK1
	Oleanolic Acid	ESR1
	Oleanolic Acid	ADRB2
	Oleanolic Acid	ESR2
	Oleanolic Acid	SLC6A4
14	Gambogic acid	none	TCMSP
	Gambogic acid	none	ETCM
	Gambogic acid	none	ITCM
	Gambogic acid	none	swisstargetprediction
15	Anileridine	none	TCMSP
	Anileridine	none	ETCM
	Anileridine	none	ITCM
	Anileridine	none	swisstargetprediction
16	6,7-Dimethoxy-4-methylcoumarin	none	TCMSP
	6,7-Dimethoxy-4-methylcoumarin	none	ETCM
	6,7-Dimethoxy-4-methylcoumarin	none	ITCM
	6,7-Dimethoxy-4-methylcoumarin	none	swisstargetprediction
17	Prostaglandin I2	none	TCMSP
	Prostaglandin I2	none	ETCM
	Prostaglandin I2	none	ITCM
	Prostaglandin I2	none	swisstargetprediction
18	Aurantiamide	ADH1B	TCMSP
	Aurantiamide	ADH1C
	Aurantiamide	ADH1A
	Aurantiamide	LYZ
	Aurantiamide	none	ETCM
	Aurantiamide	none	ITCM
	Aurantiamide	none	swisstargetprediction
19	Vinpocetine	none	TCMSP
	Vinpocetine	none	ETCM
	Vinpocetine	none	ITCM
	Vinpocetine	none	swisstargetprediction
20	Asperglaucide	SERPIND1	TCMSP
	Asperglaucide	KCNH2
	Asperglaucide	F7
	Asperglaucide	PTGS2
	Asperglaucide	PRSS1
	Asperglaucide	none	ETCM
	Asperglaucide	none	ITCM
21	Glycodeoxycholic acid	none	TCMSP
	Glycodeoxycholic acid	none	ETCM
	Glycodeoxycholic acid	none	ITCM
	Glycodeoxycholic acid	none	swisstargetprediction
22	1-Linoleoyl-sn-glycero-3-phosphorylcholine	none	TCMSP
	1-Linoleoyl-sn-glycero-3-phosphorylcholine	none	ETCM
	1-Linoleoyl-sn-glycero-3-phosphorylcholine	none	ITCM
	1-Linoleoyl-sn-glycero-3-phosphorylcholine	none	swisstargetprediction
23	5-Fluoro ABICA	none	TCMSP
	5-Fluoro ABICA	none	ETCM
	5-Fluoro ABICA	none	ITCM
	5-Fluoro ABICA	none	swisstargetprediction
24	(2E,4Z)-9-Oxooctadeca-2,4-dienoic acid	none	TCMSP
	(2E,4Z)-9-Oxooctadeca-2,4-dienoic acid	none	ETCM
	(2E,4Z)-9-Oxooctadeca-2,4-dienoic acid	none	ITCM
	(2E,4Z)-9-Oxooctadeca-2,4-dienoic acid	none	swisstargetprediction
25	9-Oxo-ODE	none	TCMSP
	9-Oxo-ODE	none	ETCM
	9-Oxo-ODE	none	ITCM
	9-Oxo-ODE	none	swisstargetprediction
26	trans-EKODE-(E)-Ib	none	TCMSP
	trans-EKODE-(E)-Ib	none	ETCM
	trans-EKODE-(E)-Ib	none	ITCM
	trans-EKODE-(E)-Ib	none	swisstargetprediction
27	3,6,9,12-tetraoxatetracosan-1-ol	none	TCMSP
	3,6,9,12-tetraoxatetracosan-1-ol	none	ETCM
	3,6,9,12-tetraoxatetracosan-1-ol	none	ITCM
	3,6,9,12-tetraoxatetracosan-1-ol	none	swisstargetprediction
28	Syringic acid	GRIA2	TCMSP
	Syringic acid	ADRA2A
	Syringic acid	ADRA1B
	Syringic acid	AKR1C1	ETCM
	Syringic acid	EDNRA
	Syringic acid	GLO1
	Syringic acid	HSPA5
	Syringic acid	IKBKB
	Syringic acid	NFKB1
	Syringic acid	NFKB2
	Syringic acid	NFKBIA
	Syringic acid	PRKAA1
	Syringic acid	PRKAA2
	Syringic acid	PRKAB1
	Syringic acid	PRKAB2
	Syringic acid	PRKAG1
	Syringic acid	PRKAG2
	Syringic acid	PRKAG3
	Syringic acid	PTGS1
	Syringic acid	PTGS2
	Syringic acid	RPS6KA3
	Syringic acid	SHBG
	Syringic acid	TP53
	Syringic acid	CA1	ITCM
	Syringic acid	CA7
	Syringic acid	CA2
	Syringic acid	CA5A
	Syringic acid	CA3
	Syringic acid	DHFR
	Syringic acid	MPO
	Syringic acid	CA4
	Syringic acid	CA14
	Syringic acid	CA9
	Syringic acid	CA12
	Syringic acid	CA5B
	Syringic acid	CA6
29	Gentisic acid	PTGS1	TCMSP
	Gentisic acid	ALOX5
	Gentisic acid	PTGS2
	Gentisic acid	MAOB
	Gentisic acid	ADH1C
	Gentisic acid	LYZ
	Gentisic acid	CTRB1
	Gentisic acid	none	ETCM
	Gentisic acid	none	ITCM
30	Caffeic acid	PTGS1	TCMSP
	Caffeic acid	ADRB1
	Caffeic acid	PTGS2
	Caffeic acid	ADRA2A
	Caffeic acid	ADRA2C
	Caffeic acid	ADRB2
	Caffeic acid	MAOB
	Caffeic acid	MAOA
	Caffeic acid	CTRB1
	Caffeic acid	CTRB1	ETCM
	Caffeic acid	LCN2
	Caffeic acid	MIF
	Caffeic acid	RAC1	ITCM
	Caffeic acid	NOS2
	Caffeic acid	SLC6A3
	Caffeic acid	CA2
	Caffeic acid	PLAU
	Caffeic acid	PTGS2
	Caffeic acid	AKR1B1
	Caffeic acid	ADRA1A
	Caffeic acid	SELP
	Caffeic acid	MAOB
	Caffeic acid	PTGS1
	Caffeic acid	DPP4
	Caffeic acid	ADRB2
	Caffeic acid	ACHE
	Caffeic acid	ADRA2A
	Caffeic acid	TNF
	Caffeic acid	ADRB1
	Caffeic acid	ADRA1D
	Caffeic acid	17
	Caffeic acid	ADRA2C
	Caffeic acid	CDK2
	Caffeic acid	PRSS1
	Caffeic acid	CTRB1
	Caffeic acid	F2
	Caffeic acid	BTK
31	Suberic acid	none	TCMSP
	Suberic acid	none	ETCM
	Suberic acid	none	ITCM
	Suberic acid	none	swisstargetprediction
32	(2-Butoxyethoxy)acetic acid	none	TCMSP
	(2-Butoxyethoxy)acetic acid	none	ETCM
	(2-Butoxyethoxy)acetic acid	none	ITCM
	(2-Butoxyethoxy)acetic acid	none	swisstargetprediction
33	Ferulic acid	PTGS1	TCMSP
	Ferulic acid	PTGS2
	Ferulic acid	NOS3
	Ferulic acid	ADRA2A
	Ferulic acid	SLC6A2
	Ferulic acid	ADRA1D
	Ferulic acid	SLC6A3
	Ferulic acid	ADRB2
	Ferulic acid	LTA4H
	Ferulic acid	MAOB
	Ferulic acid	MAOA
	Ferulic acid	CTRB1
	Ferulic acid	ADRA2B
	Ferulic acid	PLAU
	Ferulic acid	HSP90AA1
	Ferulic acid	none	ETCM
	Ferulic acid	NOS2	ITCM
	Ferulic acid	SLC6A3
	Ferulic acid	PTGS2
	Ferulic acid	UGT1A7
	Ferulic acid	ADRA1A
	Ferulic acid	CA3
	Ferulic acid	PKIA
	Ferulic acid	LTA4H
	Ferulic acid	CHRM2
	Ferulic acid	MAOB
	Ferulic acid	PTGS1
	Ferulic acid	MAPK1
	Ferulic acid	CYP1A2
	Ferulic acid	CA9
	Ferulic acid	CA6
	Ferulic acid	CDKN1A
	Ferulic acid	ADRA2A
	Ferulic acid	ADRA2B
	Ferulic acid	UGT1A8
	Ferulic acid	MAPK3
	Ferulic acid	CDK2
	Ferulic acid	CYP1A1
	Ferulic acid	ESR1
	Ferulic acid	F2
	Ferulic acid	CA14
	Ferulic acid	GFER
	Ferulic acid	CA1
	Ferulic acid	CA2
	Ferulic acid	PGD
	Ferulic acid	SCD
	Ferulic acid	RB1
	Ferulic acid	MAOA
	Ferulic acid	DHFR
	Ferulic acid	UGT1A3
	Ferulic acid	SLC6A2
	Ferulic acid	CA4
	Ferulic acid	HLCS
	Ferulic acid	DPP4
	Ferulic acid	ADRB2
	Ferulic acid	CA5B
	Ferulic acid	ADRB1
	Ferulic acid	CHRM1
	Ferulic acid	TYR
	Ferulic acid	CA7
	Ferulic acid	BACE1
	Ferulic acid	CCND1
	Ferulic acid	CA5A
	Ferulic acid	UGT1A10
	Ferulic acid	APP
	Ferulic acid	G6PD
	Ferulic acid	PRSS1
	Ferulic acid	CA12
	Ferulic acid	FXN
34	Azelaic acid	none	TCMSP
	Azelaic acid	none	ETCM
	Azelaic acid	none	ITCM
	Azelaic acid	none	swisstargetprediction
35	Salsalate	none	TCMSP
	Salsalate	none	ETCM
	Salsalate	none	ITCM
	Salsalate	none	swisstargetprediction
36	5-Aminothiabendazole	none	TCMSP
	5-Aminothiabendazole	none	ETCM
	5-Aminothiabendazole	none	ITCM
	5-Aminothiabendazole	none	swisstargetprediction
37	Undecanedioic acid	none	TCMSP
	Undecanedioic acid	none	ETCM
	Undecanedioic acid	none	ITCM
	Undecanedioic acid	none	swisstargetprediction
38	9-Octadecenoic acid, 5,8,11-trihydroxy-	none	TCMSP
	9-Octadecenoic acid, 5,8,11-trihydroxy-	none	ETCM
	9-Octadecenoic acid, 5,8,11-trihydroxy-	none	ITCM
	9-Octadecenoic acid, 5,8,11-trihydroxy-	none	swisstargetprediction
39	Malononitrile, vanillylidene-	none	TCMSP
	Malononitrile, vanillylidene-	none	ETCM
	Malononitrile, vanillylidene-	none	ITCM
	Malononitrile, vanillylidene-	none	swisstargetprediction
40	FA 18:1+3o	none	TCMSP
	FA 18:1+3o	none	ETCM
	FA 18:1+3o	none	ITCM
	FA 18:1+3o	none	swisstargetprediction
41	(Z)-9,10,11-Trihydroxy-12-octadecenoic acid	none	TCMSP
	(Z)-9,10,11-Trihydroxy-12-octadecenoic acid	none	ETCM
	(Z)-9,10,11-Trihydroxy-12-octadecenoic acid	none	ITCM
	(Z)-9,10,11-Trihydroxy-12-octadecenoic acid	none	swisstargetprediction
42	15-Octadecenoic acid, 9,12,13-trihydroxy-	none	TCMSP
	15-Octadecenoic acid, 9,12,13-trihydroxy-	none	ETCM
	15-Octadecenoic acid, 9,12,13-trihydroxy-	none	ITCM
	15-Octadecenoic acid, 9,12,13-trihydroxy-	none	swisstargetprediction
43	12,13-DiHOME	none	TCMSP
	12,13-DiHOME	none	ETCM
	12,13-DiHOME	none	ITCM
	12,13-DiHOME	none	swisstargetprediction
44	Methyl palmitate	PTGS1	TCMSP
	Methyl palmitate	NCOA2
	Methyl palmitate	RELA
	Methyl palmitate	IL10
	Methyl palmitate	TNF
	Methyl palmitate	IL6
	Methyl palmitate	PTGS2
	Methyl palmitate	PTGER3
	Methyl palmitate	IGHG1	ETCM
	Methyl palmitate	LCN2
	Methyl palmitate	PTGER3	ITCM
	Methyl palmitate	PTGS1
	Methyl palmitate	PTGS2
	Methyl palmitate	IGHG1
	Methyl palmitate	IL10
	Methyl palmitate	IL6
	Methyl palmitate	RELA
	Methyl palmitate	TNF
45	Deoxycholic acid	PGR	TCMSP
	Deoxycholic acid	NR3C2
	Deoxycholic acid	NCOA2
	Deoxycholic acid	NCOA1
	Deoxycholic acid	none	ETCM
	Deoxycholic acid	none	ITCM
	Deoxycholic acid	none	swisstargetprediction
46	FA 18:2+2o	none	TCMSP
	FA 18:2+2o	none	ETCM
	FA 18:2+2o	none	ITCM
	FA 18:2+2o	none	swisstargetprediction
47	12(13)-EpOME	PTGER3	TCMSP
	12(13)-EpOME	GGH
	12(13)-EpOME	TRUB1
	12(13)-EpOME	A2M
	12(13)-EpOME	none	ETCM
	12(13)-EpOME	none	ITCM
48	Octadecanedioic acid	none	TCMSP
	Octadecanedioic acid	none	ETCM
	Octadecanedioic acid	none	ITCM
	Octadecanedioic acid	none	swisstargetprediction
49	Juniperic acid	none	TCMSP
	Juniperic acid	none	ETCM
	Juniperic acid	none	ITCM
	Juniperic acid	none	swisstargetprediction
50	Oleic acid	PTGS1	TCMSP
	Oleic acid	PTGS2
	Oleic acid	RXRA
	Oleic acid	NCOA2
	Oleic acid	RHO
	Oleic acid	CHRM3
	Oleic acid	KCNH2
	Oleic acid	CHRM1
	Oleic acid	SCN5A
	Oleic acid	F7
	Oleic acid	F7
	Oleic acid	OPRD1
	Oleic acid	PDE3A
	Oleic acid	ADRA1B
	Oleic acid	ADRB2
	Oleic acid	ADRA1D
	Oleic acid	HSP90AA1
	Oleic acid	RXRB
	Oleic acid	CALM2
	Oleic acid	PGR
	Oleic acid	ABL1	ETCM
	Oleic acid	ACSL3
	Oleic acid	ACSL4
	Oleic acid	ADH5
	Oleic acid	ARF1
	Oleic acid	ARF6
	Oleic acid	C8G
	Oleic acid	CALM1
	Oleic acid	CNR1
	Oleic acid	CNR2
	Oleic acid	CYP2C8
	Oleic acid	ECI2
	Oleic acid	ELOVL4
	Oleic acid	FADS1
	Oleic acid	FADS2
	Oleic acid	FFAR1
	Oleic acid	FKBP1A
	Oleic acid	FURIN
	Oleic acid	GLTP
	Oleic acid	GM2A
	Oleic acid	GUCA1A
	Oleic acid	HNF4A
	Oleic acid	HNF4G
	Oleic acid	INS
	Oleic acid	LALBA
	Oleic acid	LIP3
	Oleic acid	LTB4R
	Oleic acid	LTB4R2
	Oleic acid	LTF
	Oleic acid	LY96
	Oleic acid	NCOA1
	Oleic acid	NR1H4
	Oleic acid	PAEP
	Oleic acid	PKIA
	Oleic acid	PLA2G1B
	Oleic acid	PLA2G2A
	Oleic acid	PLA2G2D
	Oleic acid	PLA2G2E
	Oleic acid	PMP2
	Oleic acid	PPARA
	Oleic acid	PPARD
	Oleic acid	PPARG
	Oleic acid	PPA_RS05235
	Oleic acid	PPP3CA
	Oleic acid	PPP3R1
	Oleic acid	PPT1
	Oleic acid	PRKACA
	Oleic acid	PTGS1
	Oleic acid	PTGS2
	Oleic acid	PVR
	Oleic acid	RCVRN
	Oleic acid	RHO
	Oleic acid	RXRA
	Oleic acid	RXRB
	Oleic acid	RXRG
	Oleic acid	S100B
	Oleic acid	SEC14L2
	Oleic acid	SLC8A1
	Oleic acid	SREBF1
	Oleic acid	TLR4
	Oleic acid	TM1468
	Oleic acid	TRAPPC3
	Oleic acid	TRPV1
	Oleic acid	VLDLR
	Oleic acid	MAPK14	ITCM
	Oleic acid	NOS2
	Oleic acid	CA2
	Oleic acid	PTGS2
	Oleic acid	OPRD1
	Oleic acid	PPARG
	Oleic acid	SCN5A
	Oleic acid	PTGS1
	Oleic acid	CCNA2
	Oleic acid	RXRA
	Oleic acid	DPP4
	Oleic acid	CHEK1
	Oleic acid	ADRB2
	Oleic acid	ACHE
	Oleic acid	ADRA1D
	Oleic acid	CHRM1
	Oleic acid	AR
	Oleic acid	PTPN1
	Oleic acid	GSK3B
	Oleic acid	KCNH2
	Oleic acid	HSP90AA1
	Oleic acid	RHO
	Oleic acid	IGHG1
	Oleic acid	PDE3A
	Oleic acid	NCOA2
	Oleic acid	ADRA1B
	Oleic acid	F7
	Oleic acid	CDK2
	Oleic acid	PRSS1
	Oleic acid	CALM1
	Oleic acid	ESR1
	Oleic acid	RXRB
	Oleic acid	F2
	Oleic acid	F10
	Oleic acid	PGR
	Oleic acid	ESR2
	Oleic acid	CHRM3

## Sheet: Supplementary file 3 
Supplementary file 3 RA targets from DisGenet, OMIM and GeneCards databases
LACC1
IL10
IL6
CIITA
CD244
NLRP1
SLC22A4
PTPN22
PSTPIP1
LTA
NFKBIL1
RA
MIF
C13orf31
CSIF
IFNB2
MHC2TA
NAIL
NALP1
OCTN1
PEP
PSTPIP
TNFB
JUVAR
GVHDS
BSF2
C2TA
NKR2B4
KIAA0926
PTPN8
CD2BP1
HSF
SLAMF4
DEFCAP
LYP
PAPAS
HGF
CARD7
VAMAS1
MSPC
AIADK
JRRP
TNF
HLA-DRB1
STAT4
IRF5
IL2RA
MIR146A
HLA-B
IL2RB
PADI4
IL1B
CRP
MIR155
H19
AP4B1-AS1
COPA
IL17A
TLR1
ZFAS1
CTLA4
HOTAIR
NOD2
MIR132
MMP3
TNFRSF1A
IL1RN
MALAT1
SNHG29
MIR150
PTPN2
SUPT20H
CHRNG
UCA1
CCR6
HLA-DQB1
IL18
TNFRSF1B
CD247
SNHG28
IL2
ANKRD55
FBXL19-AS1
TRAF1
IL1R1
TNFSF11
MMP1
FCRL3
IL1A
SYK
IFNG
TLR4
IL4
PTGS2
CXCL8
COMP
CD40
MEFV
CCL2
MTHFR
TNFRSF11B
SAA1
IL23R
MMP13
IL1RAPL2
FAS
MACIR
MMP9
BLK
COL2A1
FCGR3A
FCGR2A
VEGFA
IL6ST
IL15
TLR2
TGFB1
TIMP1
VCAM1
HLA-DQA1
CCR5
CD40LG
ACP5
S100A9
FCGR3B
SLC11A1
ICAM1
MMP2
IL13
TNFAIP3
SERPINH1
HMGB1
MIF-AS1
IL6R
FOXP3
TNIP1
IL21
PDCD1
NLRP3
IL6-AS1
LOC126859963
LOC100287329
IL7
CSF2
HSPD1
BGLAP
SPP1
SELE
MBL2
CSF1
REL
S100A8
TNFRSF11A
HP
S100A12
HLA-C
CXCL10
CCL5
IL23A
IL10RA
FASLG
IL17RA
FCGR2B
HLA-DPB1
CCR1
FLG
CD79A
FSTL1
TTR
MICA
TNFSF13B
BMP6
CD4
SLC19A1
ADAM17
GPI
CCR2
CCL3
CD28
STAT3
PHF19
PRTN3
RELN
MMP14
TAGAP
ITGAM
ITGAV
PADI2
SOCS1
ADIPOQ
GAS5
PTGS1
HLA-DMA
NOS2
TNFAIP6
MMP12
NR4A2
ATIC
IL37
MICB
MAPK14
NFKBIA
MMP8
CHI3L1
PTPRC
CD44
IFNB1
MPO
NFKB1
MAFB
CXCL12
ACAN
BTNL2
JUN
LINC02605
HSPA4
OLAH
RIPK1
LTF
STAT1
CXCR3
ICOSLG
IL12B
MAPK1
NR3C1
RELB
CCR3
ITGB2
HLA-DMB
TAP2
CARD8
DDX39B
HSPA5
CD80
OSM
TNFRSF13C
CTSK
STEAP4
TFRC
BSG
CXCR5
RETN
ALB
SIAE
PIK3CG
IRAK1
TRAF6
MAPK8
TLR3
CD36
ADAMTS4
APOH
DHODH
CXCL1
BST1
AGER
CXCR4
SERPINA3
ELANE
CCL20
NAMPT
TLR9
PLA2G2A
CCRL2
IL16
FOLR2
CSF1R
IL11
CRH
TIMP2
CLEC16A
SAA4
CX3CR1
CD69
CD86
ANXA5
CCR7
TNFRSF6B
CR1
IL22
CPT2
GZMB
PRRC2A
B2M
BTLA
FOS
PPP1CA
TNFRSF10A
C4A
C5
CCL4
TNFSF13
FPGS
CX3CL1
SOCS3
ALOX5
IL32
ANXA1
PRG4
LIN54
ZNF354A
USP50
FRG2C
CAST
CILP
MEG3
CCN6
ENO1
PPP1CB
CD5
SELL
CTSB
CXCL9
IL18R1
ZFP36
TRB
MAP3K8
LIF
PPP1CC
SH2D1A
JAM3
LRRK2
CXCL5
ABCB1
CCR4
HFE
CTSG
ITGA4
CCL21
SYVN1
NPSR1
ITGAL
GNAQ
HTRA1
ADORA3
TNFRSF9
HAS1
IKBKB
SAA2
DHFR
FCGR1A
SRF
KLRK1
CHUK
IL18BP
TNFSF14
CDH11
JAK3
PRSS2
IL21R
CSF3
LECT2
LTBR
DEK
ANKH
ERAP1
VDR
TP53
PLA2G10
SIGLEC1
TNFRSF4
ZNF334
IL26
PLB1
PSMB9
IL17B
FPR2
FN1
IL1RAP
HAPLN1
CAT
MMP19
GSTM1
GOLGB1
SFTPD
ICOS
HLA-DRB4
AIRE
CR2
ETS1
GPT
IL22RA1
C4B
RELA
IL17F
LINC01672
TNFRSF18
PRL
IL33
IL36RN
HLA-DRA
HLA-A
APOB
TYK2
WAS
TPMT
XIST
INS
ACE
MIR21
IL12A
HPRT1
VWF
TLR7
CERNA3
TYMS
HMGB2
TNFSF4
CXCL13
ERAP2
PON1
CASP1
PTGES
HGD
MIR22
HLA-DQA2
GSTP1
ANGPT2
SLC22A5
RAG2
IL3
IL19
MYC
MIR146B
PLA2G7
CD8A
MIR125A
MIR223
LEP
PPARG
CCL18
TNFSF12
MMP10
PRKCQ
MVK
TRPV4
MMP7
IGF1
TMSB4X
MUC5B
FRZB
IL10RB
BCL2
IFNGR1
ADA
HLA-G
HGF
AFF3
PXK
NOS3
IFNG-AS1
CDK6
IL4R
MECP2
CD274
APOA1
PTH
PRKCD
FGF2
BMP2
TNFRSF13B
PLA2G4A
CALCA
NAT2
UBE2L3
HIF1A
PIK3CD
CD58
NLRP12
OLIG3
MYD88
RUNX1
RASGRP1
DPP4
CARD14
CDKN1A
IL5
GHRL
DNASE1L3
DKK1
CCN1
FGFR1
PVT1
CYP2C19
RAG1
TNFRSF14
COL9A2
GC
P2RX7
CD14
FBN1
XDH
SERPINE1
HAMP
BDNF-AS
IFIH1
SMAD3
RBPJ
COX5A
CFLAR
TF
HMOX1
CD226
IRF4
LINC-ROR
MIR142
MMEL1
CASP10
TNFSF10
GATA3
CASP8
CP
CCHCR1
POMC
PTEN
CYP1A2
NFKB2
CYP2C9
IGKC
ICAM3
JAK2
TAP1
CD19
SOD1
SRC
MIR34A
F2
BANK1
KIF5A
DNASE1
IRF1
JAK1
COL1A1
JAZF1
BLTP1
SLC17A5
MMP15
BIRC5
ADAMTS5
PSORS1C3
SH2B3
SUMO4
XIAP
TMX2-CTNND1
MTRR
ENG
CALR
SPRED2
IFNA1
CCN2
MUC1
ADGRE5
ADAMTS12
NFKBIE
MTR
AIF1
PTX3
TNXB
CD27
BPI
LGALS3
MIR221
PRKCH
CASP3
MIR381
MIR151A
NEAT1
TNFSF15
MIR133B
MIR17
APOE
PLAUR
GCH1
CD83
TAPBP
ACTA2
HAVCR2
CSN1S1
MIR23A
HLA-DRB5
TRPV1
LRP5
BTK
ESR1
CD163
PDE4A
ADA2
LBR
GDF5
EPO
MS4A1
LINC00426
LINC02384
IRF8
HSPA8
MIR494
F3
EGF
MIR140
OPRM1
COL11A2
TRIM21
BCL2L1
MIR320A
SOD2
COL9A3
CFI
ZAP70
ITGB1
NGF
CXCR2P1
VIP
CD2
CCL11
GGH
FAM167A
LRBA
SELP
DCN
GSTT1
MIR99B
SIRT1
ALOX5AP
LERFS
TTC7A
CXCL16
MIR197
TGFB2
LGALS9
IGHM
HLA-DQB2
TREX1
HLA-DOA
TNPO3
TSBP1
ADAMTS7
CALCR
PTGER4
VIM
ADRB2
LTB
AKT1
KIT
CEACAM8
PRF1
THBD
KCNJ11
SERPINA1
COL11A1
MIR10A
MTOR
ATG5
ESR2
COL5A2
F2RL1
P4HA2
IL34
NOTCH4
ATXN2
TEK
ITGA2
PSMB8
PLAU
MIR30A
MIR126
MIR143
PICSAR
UBASH3A
ASPN
RAD51B
PPARA
CD55
FLT1
HAVCR1
CCL19
CYP3A4
ATM
SOST
MATN1
FCAR
ITPA
B3GAT1
TACR3
NPY
BDNF
IL7R
PRDM1
EDN1
COG6
PLAT
HTR2A
TNFRSF17
MMP17
IBSP
ANGPT1
EGFR
MIR222
HRH2
PARN
CENPB
IL9
IGF2
H2AC18
C3
BRD2
IL27
PTPN11
HJV
PSORS1C1
MIR210
UNC13D
GBA1
UBA1
NLRC4
AR
TLR5
CD38
APOM
IL20
TFR2
IGFBP1
PARP1
CCL13
ALPL
CST3
MYOM2
NPPB
TREM1
PNP
MIR499A
NTAN1
IRAK4
TAC1
TGFBR2
MIR106A
KITLG
GZMA
DDR2
LSM2
ABCG2
FGF1
AMPD1
MIR346
TRAF3IP2
MTHFD1
S100A4
LEPQTL1
SLX1A-SULT1A3
RNPC3
NFATC1
LPIN2
MIR214
LBH
NAGLU
CYP21A1P
AIM2
EMSLR
MRAP
ARID5B
BCL2L11
LCK
TACR1
IL15RA
TGFBR1
ACP1
KIR2DS2
ELN
TNFRSF25
IDO1
TLR8
PLD4
HLA-DPA1
CXCR6
TBX21
CYLD-AS1
RHOA
C5-OT1
MIR145
WAKMAR2
DCLRE1C
SOD2-OT1
NOD1
NFE2L2
MIR498
ENPP1
RTKN2
SMAD2
WDFY4
TRH
SERPINC1
C1QB
PIP4K2C
MIR31
IL12RB1
PGF
CFTR
IKBKE
TSLP
MIR769
CD1D
ANPEP
PDGFRB
IL17D
RORC
MIR141
LOC126862264
RO60
MIR382
CD209
IFNA2
CD68
NOTCH1
CYP21A2
YDJC
GSR
SPTAN1
MIR16-1
CYP19A1
IFNGR2
ADAD1
KDR
CD81
TGIF1
ASAH1
SAAL1
ELP1
FCER2
COL9A1
XK
REN
SNORD44
STAT6
PRDX5
MIR20A
GRN
IMPDH2
TIMP3
DNTT
LCE3C
CD70
B3GNT2
MAP3K7
LCE3B
MIR629
HSP90AB1
MBP
CTSL
MIR98
MIR575
MIR543
CXCR2
ABCC1
MIR483
TH
MIR486-1
U2AF1
RARRES2
MIR203A
CDK2
MIR122
CD59
GSN
PERP
FADD
WIPF1
ELMO2
GPX3
CCL22
TAB1
CFH
FLNB
NTRK1
TRA-TGC7-1
IRF3
GPSM3
CCL26
HRH4
SLAMF1
CCL17
LGALS2
MIR99A
ITGAX
PDGFB
GGT1
IL1RL1
APRT
RBP4
FLI1
CYTOR
PIK3R1
THBS1
PGR-AS1
CXCR1
CA2
ALOX15
IKZF3
IL1RL2
CD101
C5AR1
CEBPB
HLA-DRB6
ELMO1
MIR15B
AHR
IL1F10
COL10A1
FCN2
CLU
DUSP1
MIR199B
ARL15
COL5A1
NRP1
CDKN2A
IL24
DRAIC
TYR
LBP
SYNGR1
GUSB
LEPR
CHD7
S1PR1
MIR451A
MIR92B
CSK
MDM2
MAPK10
AKT2
RNASEH2B
PLCL2
ENSG00000083622
DPEP1
MAP3K14
HLA-DRB9
PLG
CXCL2
AXL
ADORA2A
CAMP
MET
IL36A
HNRNPA2B1
SLC2A9
IGFBP3
FOXO3
MCL1
VIPR1
RSBN1
IGF1R
GTF2I
PECAM1
SUOX
FLT3
ERBB3
RPLP1
ADM
TEC
KCNQ1
HDAC1
FOXO1
LINC01104
MIRLET7E
ERBB2
MIR27A
BMP7
SUMO1
KLF12
KIR2DL3
PGR
YWHAH
EGR1
IGHE
MSN
HNF1A-AS1
PF4
PTHLH
TIMELESS
MTCO3P1
CREB1
DDX6
TNFRSF8
AICDA
MAP2K4
CYP17A1
CDK4
SQSTM1
PADI6
MSH5
TIE1
MIR500A
DUSP22
TAB2
CCL7
KIR2DL2
ANXA2
TRAF2
LPA
FCN3
BACH2
KLRD1
SOX9
NCF4
ADRB3
DNMT1
MB
LILRB1
MIR663A
NT5E
HNRNPC
ANGPTL4
TMEM187
MAP3K1
ADAM15
FAP
TPO
SPI1
GSDMB
AHSG
HLA-DQB1-AS1
IL2RG
TTN
BAG6
LOC102723407
PPBP
IFNL1
IREB2
PHTF1
SSB
ZNF774
ADAM10
TNFRSF12A
THPO
SHBG
PLOD2
MMP11
ZPBP2
RIPK2
CAMLG
SNORD15A
KIR2DL1
F5
GNAS
IFI16
LGALS8
IL18RAP
ACTR2
ICAM2
PABIR2
TSIX
MIR326
GHSR
HLA-DOB
GATA4
LINC02656
IL36G
FCGR2C
ANXA3
POU3F1
MIR154
TXNDC5
GFAP
SLC22A12
SLCO1B1
CDKN3
ABCC8
MIR379
LGALS3BP
HDAC4
SHMT1
XRCC1
PSORS1C2
RUNX2
MAP2K6
BMP4
COL1A2
FCGRT
PRKCB
HSPA1A
FTO
LGALS1
A2M
YY1
CSNK2B
MAPKAPK2
CCL8
ADAR
XBP1
ITGA5
TYRO3
HRAS
TNC
HLA-E
PROCR
KRT18
PPIA
LST1
EP300
REL-DT
ETS2
CYP1A1
MIR26B
CXCL11
TRIP11
IRAK3
ELAVL1
FAS-AS1
GLA
FADS1
HCP5
DNASE2
VAV1
STAT5A
TXN
IL12RB2
CALCRL
SULT1A3
SPARC
SEMA3A
FGFR2
RAC1
SALL3
VEGFC
TNFRSF10B
MIR125B1
MIR204
TGM2
MTNR1B
CNR2
PTGER2
RNU6-1
CASP7
RFC1
FCRL4
KLRC1
RIGI
TCN1
ZNF438
MPIG6B
RPS6KA4
TAC3
CDKAL1
FGFR3
CHST11
MIR124-1
TERT
CHRM3
OS9
MIR410
PRKG1-AS1
CD1A
CYCS
WNT5A
ITLN1
INPP5B
MAPK3
MIR181D
MIR212
MIR211
ATRIP
ATRIP-TREX1
BRAF
ALPP
SDC3
TREH
STING1
VTCN1
MIR215
LPAR1
VTN
MIR7-3HG
PLCL1
ZFAT-AS1
MIR130A
CHRNA7
CCL3L1
LSP1
TP63
CAV1
ROCR
FAM107A
BMP5
SEMA3C
C6orf47
SOD3
KRT18P39
PFKM
TGFB3
OSCAR
CD22
UGT1A1
SPHK1
IGHG2
MIR199A1
NGFR
SPATA31F1
IL17RC
C1QA
SHH
CYB5A
TERC
FADS2
TIRAP
MIR100
IL36B
ENPP2
PDE2A
MIR5196
HAS2
WNT1
MC3R
KLRB1
CLEC3B
HDAC9
MALT1
CLNK
ACOXL
F13A1
ARAP1
MAP2K3
BAX
RNF182
PFKFB3
ALDH2
PPP3CA
GAS6
MAP2K7
CYP2D6
RPA3
ANGEL2
PAX5
HSP90AA1
PTPN12
CD276
APLN
MIR600
MMP16
TAX1BP1
ICA1
SEMA4D
GDF15
WARS1
TIA1
MIR27B
SNRNP70
IL17C
ABCC2
NCF2
ABHD16A
CCN4
TLR6
CFB
IL20RB
YPEL5
MMP20
MAPK9
QDPR
MIRLET7C
LPL
MIR423
LCN2
MIR106B
GNRHR
NLGN3
IRF2BP2
ATOD1
FKBP5
RNGTT
PHRF1
NRM
FCN1
DDR1
BATF
ATF2
EBI3
MIR22HG
UGDH
MC4R
PYCARD
MIR191
IRX1
FLT4
PWAR4
TGFA
NRXN1
ARHGEF3
AFP
STAT5B
LDLR
DCAF5
CCL15
SLAMF7
BAK1
SDC1
HSPG2
CISH
CD34
MAP3K2
CASP9
CARD9
HSPA1L
COL3A1
MIR766
PCSK9
BCL6
EOMES
TRD
CTSD
TXNRD1
RPS12P4
MIR199A2
FCRLA
PRKDC
AOX1
JDP2
TSPO
NTF3
MIR34C
ENSG00000274029
GPANK1
MT-CYB
C1S
EZH2
ZNF175
IAPP
EZR
AGTR1
HLA-DQB3
MAPK13
QPCT
LAIR1
NCAM1
KLRC2
GAST
IL1R2
ENTPD1
CYP27B1
CLEC12A
NFKBIB
PADI3
BST2
CCL1
HARS1
MIR638
MIR155HG
ATG16L1
CASR
DNMT3A
TRA
SST
SPRY2
TXNDC11
EPAS1
SCGB1A1
LTB4R
SLC22A7
GIN1
RPL7
CD200R1
NEDD9
PDCD5
CASC2
KL
FMOD
PLA2G5
TNFSF18
SLAMF6
CGAS
WDR26
CPEB4
CNR1
MIR532
PCNA
ADAMTSL1
IL31
E2F2
KIR3DL1
CUTALP
FNDC1
CLEC7A
SMIM20
MIR26A1
IFNAR1
MIR373
SMAD7
MIR149
TUG1
IKBKG
MOB3B
BMX
HCCAT5
PWAR1
HTR3A
SFTA3
CLEC4E
UCN
ITGA1
MIR9-1
TCF7L2
EPHB1
MIR425
KIR2DS1
GYPC
CREBBP
TNNT2
TMPO
PFKL
TRHDE
PHACTR3
ZNF311
LINC00158
HNF4A
OLR1
LOC100506023
RAMP2
MIR338
NCF1
PTK2B
MIR200C
CD46
CNMD
G3BP1
BMS1P20
HSPA1B
ALPK1
CLEC4A
MAP3K5
EFEMP1
ATP1A1
APP
XCR1
MIR127
PSMD5
LINC02357
HLA-DRB3
SERPINF1
TYRP1
MIR30E
PDE3A
SLCO1C1
FGF23
CMKLR1
NFAT5
GHR
TCN2
SERPINF2
HDAC2
LALBA
S100A1
DRD1
DNM1L
ITGB7
IKZF1
MIR522
TSPAN33
MIR29C
FLT3LG
FABP4
HSD11B2
MIRLET7B
FURIN
LINC01193
PTPN3
VEGFD
MIR103A1
C1QC
CEP57
STAG1
GRHL2
TPD52
DGUOK-AS1
TANK
MTNR1A
MLKL
CHIT1
PTPRT
CTHRC1
CTNNB1
C1R
IGES
HLA-S
MERTK
EXOSC10
TACR2
FLNA
CD160
SFRP1
MIRLET7G
MSMB
MST1
HBEGF
ADAMTS13
CD52
KCP
VSIG4
CDH13
LETR1
MIR370
COMT
TYMP
MEG8
RDX
LILRA3
SAT1
MX1
NOTCH2
CBL
F2R
PGK1
RNASE2
CNTF
DSG1
MASP2
B4GALT7
RASGRP4
MITF
RCAN1
HOXD13
GRK2
ACKR3
HSD11B1
STS
BGN
SMS
ABCC5
ABCC4
GRK6
HCLS1
HOXD10
BCL2A1
NR4A3
CAV2
ABCC3
GPRC5A
LHX2
MAB21L2
TXNIP
GSDME
LY96
GART
RGMB
HOXD11
ITGA6
MARCKS
RAB8A
PLEK
DDIT4
BAIAP2L1
PSG5
NDUFA4L2
PTK2
RAP2A
BDKRB2
CXCL6
TLE3
TNFAIP2
TFPI2
CALD1
ST6GALNAC5
MGARP
B3GNT9
SLC25A12
CD3E
ISG20
CCL27
CDSN
RPP14
C2
NELFE
KIAA1109
COL4A1
DAXX
ETFA
SMTNL2
EMCN
ATP6V1G2
RARB
MYO18B
NTN1
SH3PXD2A
ZDHHC20P2
TMPOP1
HNRNPA1P2
NONOP2
UBDP1
CYP4F23P
PSMB8-AS1
MUC22
MSH5-SAPCD1
ATP6V1G2-DDX39B
PPT2-EGFL8
TSPAN5
TRIM10
LINC01934
LNCPRESS1
LINC00824
TSBP1-AS1
C3orf67-AS1
C2-AS1
HCG9
ASB15-AS1
LOC102724971
NEBL
LINC02356
LINC02571
ETV7-AS1
LINC01748
AGPAT1
AHSA1
CDC42EP3
EHMT2-AS1
MDC1-AS1
CELF2
MTCO2P12
LINC02196
PAPOLA
EHMT2
HTD2
TRIM31
SMIM40
CSMD3
RPL3P2
IP6K3
CLIC1
RAVER1
CNTFR
RBM45
FLACC1
TRIM40
MUCL3
SGCZ
ATF6B
CRK
CRYGD
ASB15
CSTF3
ZNF595
ERICH1
DGKQ
MDGA2
ZNF679
CLYBL
DLG2
C3orf67
TRIM39-RPP21
EPHB2
NKAPL
GPC5
ABCF1
PDS5A
SDF2L1
HCG27
WDR27
GABBR1
ASF1A
RNF19A
RCHY1
LY6G6F
MAGI3
POLDIP2
FBXW8
GEM
GFRA1
DKK3
HPGDS
GNL1
LINC00294
HECTD4
TMEM235
HCG22
GUCY1B2
HLA-DPB2
IFNA13
ILF3
ITPR3
GALNT18
ZKSCAN4
TMEM179
SFTA2
COL11A2P1
LINC02649
GATA3-AS1
LMNA
LINC01185
LINC00243
MCCD1
TRIM26BP
DDR1-DT
HCG18
HCG17
MAP3K4
BCL2L15
MYL8P
MSI1
COX2
MTF1
MTX1
LRRC18
NM
ACR
NUP88
SNHG32
PBX2
CPA4
WNT16
RAB14
CYRIB
PIK3CA
PIK3CB
GDAP1
KRT20
NECAB2
POU5F1
RBFOX1
PPIAP9
VPS37C
ENOX1
KIF26B
PPP1R10
TCP11L1
CDK5RAP2
ZNF302
TRIM39
PSMA4
PRDM10
VARS2
PRR12
DENND1A
ANO8
NCOA5
LY6G5B
LY6G6D
RARA
ACTB
RIT2
RNF5
RPL37A
RPS18
RPS19
VPS52
PRDM16
CLSTN2
LINC00452
HLA-DPA2
GORASP1
SKIV2L
WNK1
PCDH15
CASTOR1
SLC6A11
SOAT1
SNORA38
SYT1
BTF3P11
TCF19
TRBV20OR9-2
TRPS1
DCDC2C
VARS1
TRIM26
ZSCAN26
DDA1
HSD17B8
OR2H2
AIMP2
AGBL2
RPP21
ATAT1
SPSB1
CUL5
SLC44A4
VWA7
LY6G6C
LY6G5C
ZNRD1ASP
PRRT1
EGFL8
CDR3
OR5V1
OR12D3
UQCC2
DHX16
PGBD1
AIFM2
CEP89
PPIL4
SYNGAP1
STK19
NAV2
TRIM15
CCNG2
RABEP1
PPT2
GRAP2
GABBR2
CLOCK
MDC1
N4BP1
PRORP
RIPOR2
CTIF
SMG7
CNTRL
CDC42EP1
LRPPRC
WG
PRKN
MYDGF
ARHGEF5
ANP32B
CDAN1
CBLL2
MBL3P
PML
MUL1
C4B_2
KLRC4-KLRK1
HT
DMD
TBC1D9
GABPA
GCG
GLP1R
IGHV3-69-1
AGBL3
KIR3DL2
MDK
GDE1
BEST1
ZBTB16
NR1I2
BTG3
SLCO6A1
FOSB
ACAD8
GSTM2
IGHG3
JUNB
JUND
GSTK1
RPSA
HSPA14
PLA2G1B
ROS1
SP1
TM7SF2
VPS51
DHX40
ZGLP1
RABEPK
LANCL1
CDKN2D
NXF1
LOC105379528
KHDRBS1
EBNA1BP2
H3P13
H3P28
LRG1
CRABP2
CYBB
DECR1
ATN1
EDNRA
F9
MMRN1
FOXC1
SEC14L2
BBC3
GLB1
IGHV3OR16-7
IGHV3-52
TRBV16
TRBV7-9
TRBC1
RMC1
ACACA
HOXD9
APC
ARMH1
IGFBP5
LOC390714
LOX
MIP
PAEP
PRKCA
PSMD7
CCND1
REG1A
S100B
FSCN1
SOX5
TBX5
EHMT1
USO1
CD1C
ARHGEF2
TIMD4
MSC
DDX39A
SIK1B
KLF2
PDPN
HPSE
ADRM1
SLC7A9
POLG2
PRRT2
ACOT7
H4-16
SIK1
DBP
GADD45A
DNMT3B
ELAVL2
PRSS55
ERG
FCGR1B
FHL1
ACSBG1
DICER1
SMUG1
NUP62
SH3BP4
AOC1
COPD
MSTN
GDNF
SGSM3
GLS
GTF2H1
HOXC6
IDDM8
ACTBL2
H3P44
AQP1
IRS1
ABCC6
ARNTL
MIR23B
MIR17HG
FOXO4
MPG
MPP1
POTEKP
MIR323A
MSRA
GADD45B
OGG1
P4HB
PCSK6
PAK3
DCTN4
GP6
NCKIPSD
SIRT6
PIK3R2
SLC52A1
ADI1
H4C15
PROC
PSMD12
PTCH1
SEMA6A
SIGIRR
RHO
BCR
RPS6KA3
POTEM
ST6GAL1
RAPH1
SLC22A1
SLPI
SULT2A1
TFF3
ACTG1
TPI1
CRISP2
ACTG2
VIL1
SCD5
PDCD1LG2
SLC7A5
TLR10
H4C9
H4C1
H4C4
H4C6
H4C12
H4C11
H4C3
H4C8
H4C2
H4C5
H4C13
H4C14
PRAM1
SPZ1
ORAI1
[truncated: 227 more rows]

## Sheet: Supplementary file 4 
Supplementary file 4 Ranking of compounds according to degree value from high to low.
No.	Compound	Degree
1	Oleic acid	39
2	Oleanolic Acid	37
3	Ferulic acid	25
4	Caffeic acid	16
5	Syringic acid	15
6	Anisodamine	11
7	Isoferulic acid	10
8	Gentianine	10
9	Phenylalanine	8
10	Methyl palmitate	7
11	Gentisic acid	3
12	12(13)-EpOME	2
13	Leonurine	2
14	Deoxycholic acid	1
15	Corticosterone	1
16	Asperglaucide	1

## Sheet: Supplementary file 5
Supplementary file 5 The top 30 pathways with lowest FDR values
Term ID	Term description	False discovery rate
hsa05215	Prostate cancer	6.69e-20
hsa05200	Pathways in cancer	9.54e-18
hsa05167	Kaposi sarcoma-associated herpesvirus infection	9.82e-16
hsa05145	Toxoplasmosis	1.73e-15
hsa05163	Human cytomegalovirus infection	6.78e-15
hsa04657	IL-17 signaling pathway	7.2e-15
hsa05160	Hepatitis C	1.35e-14
hsa05161	Hepatitis B	1.35e-14
hsa05169	Epstein-Barr virus infection	1.35e-14
hsa04625	C-type lectin receptor signaling pathway	1.61e-14
hsa05222	Small cell lung cancer	1.38e-13
hsa04933	AGE-RAGE signaling pathway in diabetic complications	2.09e-13
hsa05142	Chagas disease	2.18e-13
hsa05133	Pertussis	2.54e-13
hsa05152	Tuberculosis	2.82e-13
hsa05166	Human T-cell leukemia virus 1 infection	4.24e-13
hsa05135	Yersinia infection	3.01e-12
hsa05140	Leishmaniasis	3.63e-12
hsa05010	Alzheimer disease	5.24e-12
hsa04064	NF-kappa B signaling pathway	5.96e-12
hsa04066	HIF-1 signaling pathway	6.31e-12
hsa04668	TNF signaling pathway	1.51e-11
hsa04218	Cellular senescence	2.11e-11
hsa04380	Osteoclast differentiation	3.25e-11
hsa05164	Influenza A	5.19e-11
hsa04917	Prolactin signaling pathway	6.8e-11
hsa04620	Toll-like receptor signaling pathway	9.63e-11
hsa04660	T cell receptor signaling pathway	9.63e-11
hsa05212	Pancreatic cancer	9.63e-11
hsa05162	Measles	1.1e-10
